# Supplementary material for: When Does Reward Maximization Lead to Matching Law?
Source: PLoS One. 2008 Nov 24;3(11):e3795. doi: 10.1371/journal.pone.0003795 (PMC2582656; doi:10.1371/journal.pone.0003795)
Supplement: Text S2 — Matching strategy in state-dependent choice behaviors. The extensions of the stationary condition and the matching law are derived. (0.19 MB DOC) [file pone.0003795.s002.doc]

**S2. Matching strategy in state-dependent choice behaviors**

**Stationary condition of the matching strategy**

The stationary condition given as Eq. 7 in the main text was derived for the purpose of avoiding the difficulty in calculating in Markov decision processes[29]. We provide another derivation suitable for the present framework. To transform , we use the recursive relation for the long-term state distribution , where . By setting and according to the matching strategy, we obtain

where we used the simplified expression and the relation . Transforming repetitively in the same way, we obtain

where we used the relation derived from the probability conservation. If the infinite sum converges, then and we can simplify by taking the limit: . However, the infinite sum may oscillate. In order to avoid oscillations in the individual terms, we take the average over to obtain

Noting that , we obtain

which coincides with the right hand side of Eq. 7 in the main text.

**Extension of the matching law**

Using vectors and , where , the stationary condition for the matching strategy (Eq. 7 in the text) is written as a vector form: . If the stationary choice probability for and , changes in the probabilities are allowed to be in an arbitrary direction that satisfies for because of the assumption for the functions (Eq. 9 in the main text). Therefore, the vector should be parallel to the vector **1** for . This implies for . To obtain a stationary point along a boundary on which for some option in some state, we forbid the changes in this direction (), and obtain that the components of should be identical for all options exhibiting non-zero choice probabilities. Using the summation , the above mentioned condition is written as “ or for ”. Using ,

Thus, we obtain Eq. 8 in the text. The extended matching law is derived from the matching strategy that attempts to maximize the average reward . In contrast, if the brain’s decision system simply attempts to maximize the average reward in each state, , without taking the total average into account, then the matching strategy leads to the normal matching law in the individual states: or for and . It is interesting to investigate which matching law, the normal one or the extended version, animals’ state-dependent choice behavior exhibits.
